# Supplementary material
Source: MDPI journal article supplement (https://www.mdpi.com/2313-0105/8/11/232)
Supplement: s1 [file s1]

## ***Supplementary Information***

### ***What differentiates dielectric oxides and solid electrolytes on the pathway toward more efficient energy storage?***

Antonio Nuno Guerreiro<sup>1</sup>, Beatriz Arouca Maia<sup>1,2</sup>, Hesham Khalifa<sup>1,3</sup>, Manuela Carvalho Baptista<sup>1</sup>, Maria Helena Braga<sup>1,2,\*</sup>

<sup>1</sup>Engineering Physics Department, Engineering Faculty, University of Porto, 4200-465 Porto, Portugal

<sup>2</sup>LAETA - INEGI, Institute of Science and Innovation in Mechanical and Industrial Engineering, 4200-465 Porto, Portugal

<sup>3</sup>Department of Physics, Faculty of Science, Damanhur University, Damanhur 22511, Egypt

\*Correspondence to: mbraga@fe.up.pt

## **S1. Introduction**

### **1.1 Silicon dioxide (SiO<sub>2</sub>)**

Silicon dioxide (known as silica with the chemical formula SiO<sub>2</sub>) has been the most commonly used insulator material in the semiconductor device industry for more than three decades [1]. SiO<sub>2</sub> is a white or colorless solid-state material with three main structures:  $\alpha$ -quartz, tridymite, and cristobalite [2]. This material is highly abundant (it makes up 90% of the Earth's crust), stable, non-toxic, and non-hygroscopic [3], [4]. Its  $\alpha$ -quartz structure, Figure 1a, has a relative dielectric constant of  $\epsilon_r \approx 3.9$  [5] and a large band gap of 8.9 eV [6]. In general, silicon dioxide has wide applications in different industries, including computer, energy, and aerospace, but also in pharmacy, agriculture, food, construction, etc. Typically, it is used in semiconductors [7,8], transistors [9], MEMS [10], insulators [11], optical devices [12], micro-electro mechanics [13], micromachining processes [14], capacitors [15], solar cells [16], fuel cells [17], and lithium-ion batteries [18–21].

### **1.2 Magnesium Oxide (MgO)**

Magnesium oxide (MgO), or magnesia, is a white, brown, or black material (depending on the presence of other foreign elements) that has a cubic crystal structure and the space group Fm-3m (sg# 225) [22,23]. It is shown in Figure 1b.

MgO has a wide bandgap of approximately 7.3–7.8 eV, high thermal stability, a thermal conductivity of 36 W.m<sup>-1</sup>.K<sup>-1</sup> at 100 °C, a significant dielectric constant of  $\epsilon_r \approx 10$ , and excellent hole-blocking features [24–27]. It has a density of approximately 3.579 g.cm<sup>-3</sup> and a high melting point of about 2800 °C [28,29]. The work function of MgO has been reported to be between 4.22 eV and 5.07 eV depending on its different crystal orientations [30]; however, in our study it was found to be considerably smaller while remaining in general agreement with our experimental

results. MgO as a metal oxide has a broad set of applications, including in gate insulators [31] of transistors [32], magnetic tunnel junctions [22], Josephson effect mesoscopic superconducting devices [33], solar cells [34], surface coatings [35], and even fertilizers [36].

### 1.3 Lithium Oxide (Li<sub>2</sub>O)

Lithium oxide (Li<sub>2</sub>O), also known as lithia, is one of the simplest oxides and has a white color. This material has a cubic antiferroite structure and the space group Fm-3m [37] (Figure 1c). Li<sub>2</sub>O is an inexpensive, safe, and highly hygroscopic material [38,39]. It has a low vapor pressure at elevated temperatures, a high tritium breeding capability, low tritium solubility, high thermal conductivity, and low electrical conductivity [40,41]. This material presents a band gap of 4.99 eV [37], a density of 1.96 g.cm<sup>-3</sup> [37], and a high theoretical specific capacity of ~571 mAh.g<sup>-1</sup> for the Li<sub>2</sub>O/Li<sub>2</sub>O<sub>2</sub> conversion reaction [42,43] or 1035 mAh.g<sup>-1</sup> when used to pre-lithiate Si anodes [38] in batteries.

Lithium oxide is a semiconductor with wide electrochemical, optical, and nuclear features with many applications in fields ranging from ceramics to glass [44–46]. Li<sub>2</sub>O has wide applications, including in heterojunctions [47], optical and lasers [48], solar systems [49], energy storage systems [50], microspheres [51], magnetic instruments [52], the nuclear industry [41], and cooling systems [41]. Li<sub>2</sub>O may also be used as a sintering additive in electrolyte membrane fabrication to reduce the densification temperature [53]. Li<sub>2</sub>O is employed as a thermal stabilizer for glasses. When adding only 3% of this material, the melting temperature is decreased by several degrees and the surface tension is improved [41]. It is one of the main constituents of the solid electrolyte interphase (SEI) layer, which forms spontaneously in Li<sup>+</sup>-ion batteries [44,54–57], behaving as a solid electrolyte; hence, comparing Li<sub>2</sub>O with LAGP and Li<sup>+</sup>-glass constitutes an added interest in the present study.

### 1.4 Na<sub>3</sub>Zr<sub>2</sub>Si<sub>2</sub>PO<sub>12</sub> (NASICON) and Li<sub>1.5</sub>Al<sub>0.5</sub>Ge<sub>1.5</sub>(PO<sub>4</sub>)<sub>3</sub> (LAGP)

In recent years, there has been a tremendous surge in the hunt for novel, stable, and highly ionic conducting solid electrolytes. Sodium superionic conductor (NASICON) structures, e.g., Na<sub>1+x</sub>Zr<sub>2</sub>Si<sub>x</sub>P<sub>3-x</sub>O<sub>12</sub> and Li<sub>1+x</sub>Al<sub>x</sub>Ge<sub>2-x</sub>(PO<sub>4</sub>)<sub>3</sub>, have been the focus of considerable interest due to their particular characteristics and electrochemical stability [58–61]. The name sodium superionic conductors (NASICONs) was initially applied to the solid solution phase corresponding to Na<sub>1+x</sub>Zr<sub>2</sub>Si<sub>x</sub>P<sub>3-x</sub>O<sub>12</sub> (0 ≤ x ≤ 3), as first suggested by Goodenough and Hong in 1976 [58,62]. The structure of Na<sub>3</sub>Zr<sub>2</sub>Si<sub>2</sub>PO<sub>12</sub> (x = 2; Fig. 1d) is disordered and monoclinic C2/c (sg# 15) at room temperature, but at 150 °C the structure is the characteristic NASICON structure (the hexagonal R-3c). Lithium analogues based on a Li<sub>1+x</sub>Al<sub>x</sub>M<sub>2-x</sub>(PO<sub>4</sub>)<sub>3</sub> NASICON-structure (where M is a

tetravalent cation with high ionic conductivity,  $M^{IV} = \text{Ti, Zr, Ge, Hf, Sr, Sn, ...}$ , and  $x = 0.3\text{--}0.7$ ) represent one of the most important NASICON-type candidates because of their unique structure, high  $\text{Li}^+$ -ion conductivity, wide electrochemical window of up to 6 V [63,64,73–76,65–72,77], low thermal expansion coefficient  $< 10^{-6} \text{ K}^{-1}$  [78], absence of crack development during heating and cooling [79], and excellent resistance to water [80]. Among these NASICON-structured ion conductors, lithium aluminum germanium phosphate,  $\text{Li}_{1+x}\text{Al}_x\text{M}_{2-x}(\text{PO}_4)_3$  ( $M^{IV} = \text{Ge}$ ), which is usually referred to using the acronyms LAGP or LAGPO solid electrolytes, is a white bulk crystal or powder that is an inorganic ceramic solid substance. LAGP in the compositional range of  $x = 0.3\text{--}0.7$  shows an activation energy for  $\text{Li}^+$ -ion mobility of  $\sim 0.37\text{--}0.31 \text{ eV}$  [81] and an ionic conductivity of  $\sim 10^{-4}\text{--}10^{-3} \text{ S}\cdot\text{cm}^{-1}$  [82] at room temperature [81,83–85]. Moreover, above  $200^\circ\text{C}$ , it shows an upsurge in conductivity to  $\sim 10^{-2} \text{ S}\cdot\text{cm}^{-1}$  [81].

As is displayed in Figure 1e, LAGP shows a rhombohedral structure with the space group  $R\text{-}3c$  (sg# 167) [86]. It consists of corner-sharing  $\text{MO}_6$ -octahedra (with  $M = \text{Ge, Al}$ ) coupled with  $\text{PO}_4$ -tetrahedra to produce 3D interconnected channels and two types of interstitial sites ( $M'$  and  $M''$ ) where mobile cations are dispersed. Mobile cations migrate from one site to another via bottlenecks, the size of which is determined by the nature of the skeleton ions as well as the carrier concentration in both types of sites ( $M'$  and  $M''$ ) [87]. Furthermore, LAGP solid electrolytes have been found to have a high electrochemical oxidative voltage of roughly 6V (vs.  $\text{Li/Li}^+$ ) [88]. A glass–ceramic LAGP was recently highlighted due to its stability in the presence of Li [88–90] and ionic conductivity as high as  $4.6 \times 10^{-3} \text{ S}\cdot\text{cm}^{-1}$  at  $27^\circ\text{C}$  [73,80,91]. The partial replacement of  $\text{Ge}^{4+}$  with  $\text{Al}^{3+}$  increased the porous density of the LAGP and the  $\text{Li}^+$  ion conductivity. As a result of its ionic conductivity, potential window, and chemical stability, glass–ceramic LAGPs with NASICON structures have been deemed some of the most promising solid-state electrolytes [92–94].

Phosphate-based materials with a NASICON crystal structure, particularly LAGP, are promising candidates for solid-state electrolytes in lithium and Li-ion batteries [79], high-voltage cathodes [95], high-energy lasers, precision optics, giant telescope mirrors [90], catalysis supports [96], membranes for heavy metal removal from industrial waste streams [97–99], and greenhouse gas ( $\text{SO}_2$  and  $\text{CO}_2$ ) sensors [84].

Finally, LAPG possesses less hazardous materials than sulfide-based solid electrolytes [79], is reasonably cost efficient, and is simple to prepare [79].

### 1.5 $\text{Li}_{2.99}\text{Ba}_{0.005}\text{ClO}$ ( $\text{Li}^+$ -glass)

Glass–ceramics are widely known due to their outstanding thermal, mechanical, and chemical stability properties, as well as their notorious mechanical strength [100–102]. Additionally, these materials show a high dielectric constant and low dielectric loss [103].

The crystal structure of  $\text{Li}^+$ -glass at 300 K is shown in Figure 1f when simulated by ab initio molecular dynamics from the optimized cubic structure, Pm-3m. In its crystalline form,  $\text{Li}^+$ -glass is an antiperovskite.

$\text{Li}_{2.99}\text{Ba}_{0.005}\text{ClO}$  and its family  $\text{A}_{2.9}\text{Ba}_{0.005}\text{ClO}$  ( $\text{A} = \text{Li}, \text{Na}, \text{and K}$ ) are safe, low-cost, ferroelectric amorphous-oxide electrolytes with a dielectric constant in the range of  $\epsilon_r \approx 10^7\text{--}10^9$  and an ionic conductivity of  $10^{-2} \text{ S.cm}^{-1}$  at  $25^\circ\text{C}$  [104–106].  $\text{Li}_{2.99}\text{Ba}_{0.005}\text{ClO}$  has been shown to conduct plasmons (currents of electrons) through the surface owing to its self-charge characteristics and positive feedback that have been demonstrated in previously studied devices such as pouch and structural coaxial batteries [104,107]. Compared to other lithium-based electrolytes,  $\text{Li}_{2.99}\text{Ba}_{0.005}\text{ClO}$  shows a lower activation energy of 0.06 eV [108]. In terms of its electronic band structure, it demonstrates a large band gap of 4.74 eV, showing a broad range of electrochemical stability. Braga et al. [104] demonstrated negative resistance and negative capacitance in the same working device for the first time [109].  $\text{Li}_{2.99}\text{Ba}_{0.005}\text{ClO}$  electrolytes have great potential for application in positive-feedback, all-solid-state architectures.

## S2. References

- [1] S. Eränen *et al.*, “Thin Films on Silicon,” *Handb. Silicon Based MEMS Mater. Technol. Second Ed.*, pp. 124–205, Jan. 2015, doi: 10.1016/B978-0-323-29965-7.00006-3.
- [2] K. L. Dionisio *et al.*, “Data Descriptor: The Chemical and Products Database, a resource for exposure-relevant data on chemicals in consumer products,” *Sci. Data*, vol. 5, Jul. 2018, doi: 10.1038/SDATA.2018.125.
- [3] D. Munteanu and J. L. Autran, “Modeling of energy bands in ultra-thin layer quantum nanostructures for solar cell applications,” *J. Non. Cryst. Solids*, vol. 357, no. 8–9, pp. 1884–1887, Apr. 2011, doi: 10.1016/J.JNONCRY SOL.2010.11.112.
- [4] E. Güler, G. Uğur, Uğur, and M. Güler, “A theoretical study for the band gap energies of the most common silica polymorphs,” *Chinese J. Phys.*, vol. 65, pp. 472–480, Jun. 2020, doi: 10.1016/J.CJPH.2020.03.014.
- [5] L. Yang *et al.*, “Thermally Evaporated  $\text{SiO}_2$  Serving as Gate Dielectric in Graphene Field-Effect Transistors,” *IEEE Trans. Electron Devices*, vol. 64, no. 4, pp. 1846–1850, Apr. 2017, doi: 10.1109/TED.2017.2665598.
- [6] E. Tea, J. Huang, and C. Hin, “First principles study of band line up at defective metal-oxide interface: oxygen point defects at  $\text{Al}/\text{SiO}_2$  interface,” *J. Phys. D. Appl. Phys.*, vol.

49, no. 9, p. 095304, Feb. 2016, doi: 10.1088/0022-3727/49/9/095304.

- [7] A. Uzum and I. Kanmaz, "Passivation properties of HfO<sub>2</sub>-SiO<sub>2</sub> mixed metal oxide thin films with low reflectivity on silicon substrates for semiconductor devices," *Thin Solid Films*, vol. 738, p. 138965, Nov. 2021, doi: 10.1016/J.TSF.2021.138965.
- [8] M. Okoshi, M. Iyono, N. Inoue, and T. Yamashita, "Photochemical welding of silica microspheres to silicone rubber by ArF excimer laser," *Appl. Surf. Sci.*, vol. 255, no. 24, pp. 9796–9799, Sep. 2009, doi: 10.1016/J.APSUSC.2009.04.072.
- [9] F. Jaehnike, D. V. Pham, R. Anselmann, C. Bock, and U. Kunze, "High-Quality Solution-Processed Silicon Oxide Gate Dielectric Applied on Indium Oxide Based Thin-Film Transistors," *ACS Appl. Mater. Interfaces*, vol. 7, no. 25, pp. 14011–14017, Jul. 2015, doi: 10.1021/ACSAAMI.5B03105/SUPPL\_FILE/AM5B03105\_SI\_001.PDF.
- [10] V. Bhatt and S. Chandra, "Silicon dioxide films by RF sputtering for microelectronic and MEMS applications," *J. Micromechanics Microengineering*, vol. 17, no. 5, p. 1066, Apr. 2007, doi: 10.1088/0960-1317/17/5/029.
- [11] R. B. M. Cross, M. M. De Souza, S. C. Deane, and N. D. Young, "A comparison of the performance and stability of ZnO-TFTs with silicon dioxide and nitride as gate insulators," *IEEE Trans. Electron Devices*, vol. 55, no. 5, pp. 1109–1115, May 2008, doi: 10.1109/TED.2008.918662.
- [12] W. J. Ho, J. C. Lin, J. J. Liu, W. Bin Bai, and H. P. Shiao, "Electrical and Optical Characterization of Sputtered Silicon Dioxide, Indium Tin Oxide, and Silicon Dioxide/Indium Tin Oxide Antireflection Coating on Single-Junction GaAs Solar Cells," *Mater.* 2017, Vol. 10, Page 700, vol. 10, no. 7, p. 700, Jun. 2017, doi: 10.3390/MA10070700.
- [13] A. Ashok and P. Pal, "Investigation of anodic silicon dioxide thin films for microelectromechanical systems applications," *Micro Nano Lett.*, vol. 9, no. 12, pp. 830–834, Dec. 2014, doi: 10.1049/MNL.2014.0360.
- [14] J. Ihlemann and R. Weichenhain-Schriever, "Laser Based Rapid Fabrication of SiO<sub>2</sub> 2-phase Masks for Efficient UV-laser Micromachining," *JLMN-Journal of Laser Micro/Nanoengineering*, vol. 4, no. 2, 2009, doi: 10.2961/jlmn.2009.02.0005.
- [15] R. A. Bailey and J. H. Nevin, "Thin-Film Multilayer Capacitors Using Pyrolytically Deposited Silicon Dioxide," *IEEE Trans. Parts, Hybrids, Packag.*, vol. 12, no. 4, pp. 361–364, 1976, doi: 10.1109/TPHP.1976.1135154.
- [16] S. O. Salawu, A. M. Obalalu, E. O. Fatunmbi, and R. A. Oderinu, "Thermal Prandtl-Eyring hybridized MoS<sub>2</sub>-SiO<sub>2</sub>/C<sub>3</sub>H<sub>8</sub>O<sub>2</sub> and SiO<sub>2</sub>-C<sub>3</sub>H<sub>8</sub>O<sub>2</sub> nanofluids for effective solar energy absorber and entropy optimization: A solar water pump implementation," *J. Mol. Liq.*, vol. 361, p. 119608, Sep. 2022, doi: 10.1016/J.MOLLIQ.2022.119608.
- [17] S. F. A. Talib *et al.*, "Thermophysical Properties of Silicon Dioxide (SiO<sub>2</sub>) in Ethylene Glycol/Water Mixture for Proton Exchange Membrane Fuel Cell Cooling Application," *Energy Procedia*, vol. 79, pp. 366–371, Nov. 2015, doi: 10.1016/J.EGYPRO.2015.11.504.
- [18] Y. Yao, J. Zhang, L. Xue, T. Huang, and A. Yu, "Carbon-coated SiO<sub>2</sub> nanoparticles as anode material for lithium ion batteries," *J. Power Sources*, vol. 196, no. 23, pp. 10240–10243, Dec. 2011, doi: 10.1016/J.JPOWSOUR.2011.08.009.
- [19] X. Dong, X. Zheng, Y. Deng, L. Wang, H. Hong, and Z. Ju, "SiO<sub>2</sub>/N-doped graphene

- aerogel composite anode for lithium-ion batteries,” *J. Mater. Sci.*, vol. 55, no. 27, pp. 13023–13035, Sep. 2020, doi: 10.1007/S10853-020-04905-Y/FIGURES/7.
- [20] M. Zhang *et al.*, “Free-standing and flexible CNT/(Fe@Si@SiO<sub>2</sub>) composite anodes with kernel-pulp-skin nanostructure for high-performance lithium-ion batteries,” *J. Alloys Compd.*, vol. 878, p. 160396, Oct. 2021, doi: 10.1016/J.JALLCOM.2021.160396.
  - [21] L. Si *et al.*, “Binder-free SiO<sub>2</sub> nanotubes/carbon nanofibers mat as superior anode for lithium-ion batteries,” *Electrochim. Acta*, vol. 404, p. 139747, Feb. 2022, doi: 10.1016/J.ELECTACTA.2021.139747.
  - [22] V. V. Afanas’ev, A. Stesmans, K. Cherkaoui, and P. K. Hurley, “Electron energy band alignment at the (100)Si/MgO interface,” *Appl. Phys. Lett.*, vol. 96, no. 5, p. 052103, Feb. 2010, doi: 10.1063/1.3294328.
  - [23] K. T. Selvi, K. A. Mangai, M. Priya, and S. Sagadevan, “Investigation of the dielectric and impedance properties of ZnO/MgO nanocomposite,” *Phys. B Phys. Condens. Matter*, vol. 594, p. 412355, Oct. 2020, doi: 10.1016/J.PHYSB.2020.412355.
  - [24] A. Posadas, F. J. Walker, C. H. Ahn, T. L. Goodrich, Z. Cai, and K. S. Ziemer, “Epitaxial MgO as an alternative gate dielectric for SiC transistor applications,” *Appl. Phys. Lett.*, vol. 92, no. 23, p. 233511, Jun. 2008, doi: 10.1063/1.2944865.
  - [25] S. Huang, B. Kang, L. Duan, and D. Zhang, “Highly efficient inverted polymer solar cells by using solution processed MgO/ZnO composite interfacial layers,” *J. Colloid Interface Sci.*, vol. 583, pp. 178–187, Feb. 2021, doi: 10.1016/J.JCIS.2020.09.047.
  - [26] A. A. M. Farag, A. Ashery, and M. A. Salem, “Electrical, dielectric characterizations and optoelectronic applications of epitaxially grown Co/n-CuO/p-Si heterojunctions,” *Superlattices Microstruct.*, vol. 135, p. 106277, Nov. 2019, doi: 10.1016/J.SPMI.2019.106277.
  - [27] G. Jiang *et al.*, “Solution-processed high-k magnesium oxide dielectrics for low-voltage oxide thin-film transistors,” *Appl. Phys. Lett.*, vol. 109, no. 18, p. 183508, Nov. 2016, doi: 10.1063/1.4966897.
  - [28] J. Hornak *et al.*, “Magnesium Oxide Nanoparticles: Dielectric Properties, Surface Functionalization and Improvement of Epoxy-Based Composites Insulating Properties,” *Nanomaterials*, vol. 8, no. 6, p. 381, May 2018, doi: 10.3390/NANO8060381.
  - [29] M. A. Subramanian, R. D. Shannon, B. H. T. Chai, M. M. Abraham, and M. C. Wintersgill, “Dielectric constants of BeO, MgO, and CaO using the two-terminal method,” *Phys. Chem. Miner.*, vol. 16, no. 8, pp. 741–746, Nov. 1989, doi: 10.1007/BF00209695.
  - [30] J. Y. Lim *et al.*, “Work function of MgO single crystals from ion-induced secondary electron emission coefficient,” *J. Appl. Phys.*, vol. 94, no. 1, p. 764, Jun. 2003, doi: 10.1063/1.1581376.
  - [31] J. H. Lee, H. S. Kim, S. H. Kim, N. W. Jang, and Y. Yun, “Characterization of magnesium oxide gate insulators grown using RF sputtering for ZnO thin-film transistors,” *Curr. Appl. Phys.*, vol. 14, no. 5, pp. 794–797, May 2014, doi: 10.1016/J.CAP.2014.03.017.
  - [32] S. Arora, “ZnO/MgO/ITO structured thin film transistor for ultraviolet photo detector application,” *Mater. Today Proc.*, vol. 30, pp. 150–152, Jan. 2020, doi: 10.1016/J.MATPR.2020.05.338.

- [33] D. Massarotti, T. Bauch, F. Lombardi, and F. Tafuri, "Josephson and charging effect in mesoscopic superconducting devices," *Supercond. Nanoscale From Basic Res. to Appl.*, pp. 309–338, Jan. 2017, doi: 10.1515/9783110456806-011.
- [34] G. Yeung *et al.*, "Robust passivation of CdSeTe based solar cells using reactively sputtered magnesium zinc oxide," *Sol. Energy Mater. Sol. Cells*, vol. 233, p. 111388, Dec. 2021, doi: 10.1016/J.SOLMAT.2021.111388.
- [35] D. Merachtsaki, E. C. Tsardaka, E. Anastasiou, and A. Zouboulis, "Anti-corrosion properties of magnesium oxide/magnesium hydroxide coatings for application on concrete surfaces (sewerage network pipes)," *Constr. Build. Mater.*, vol. 312, p. 125441, Dec. 2021, doi: 10.1016/J.CONBUILDMAT.2021.125441.
- [36] K. Xu, F. Lin, X. Dou, M. Zheng, W. Tan, and C. Wang, "Recovery of ammonium and phosphate from urine as value-added fertilizer using wood waste biochar loaded with magnesium oxides," *J. Clean. Prod.*, vol. 187, pp. 205–214, Jun. 2018, doi: 10.1016/J.JCLEPRO.2018.03.206.
- [37] Materials Data on Li<sub>2</sub>O (SG:225) by Materials Project. 2014. Available online: <https://materialsproject.org/materials/mp-1960> (accessed on 1 November 2022).
- [38] Y. Ha *et al.*, "Li<sub>2</sub>O-Based Cathode Additives Enabling Prelithiation of Si Anodes," *Appl. Sci.*, vol. 11, no. 24, p. 12027, Dec. 2021, doi: 10.3390/APP112412027.
- [39] C. Dyer, P. Moseley, Z. Ogumi, D. Rand, and B. Scrosati, *Encyclopedia of Electrochemical Power Sources*. 2009.
- [40] A. Donato, "A critical review of Li<sub>2</sub>O ceramic breeder material properties correlations and data," *Fusion Eng. Des.*, vol. 38, no. 4, pp. 369–392, Feb. 1998, doi: 10.1016/S0920-3796(97)00123-3.
- [41] H. A. Mosqueda, C. Vazquez, P. Bosch, and H. Pfeiffer, "Chemical sorption of carbon dioxide (CO<sub>2</sub>) on lithium oxide (Li<sub>2</sub>O)," *Chem. Mater.*, vol. 18, no. 9, pp. 2307–2310, May 2006, doi: 10.1021/CM060122B/ASSET/IMAGES/LARGE/CM060122BF00009.JPEG.
- [42] Y. Sun *et al.*, "High-capacity battery cathode prelithiation to offset initial lithium loss," *Nat. Energy*, vol. 1, no. 1, pp. 1–7, Jan. 2016, doi: 10.1038/nenergy.2015.8.
- [43] Y. Qiao, H. Yang, Z. Chang, H. Deng, X. Li, and H. Zhou, "A high-energy-density and long-life initial-anode-free lithium battery enabled by a Li<sub>2</sub>O sacrificial agent," *Nat. Energy*, vol. 6, no. 6, pp. 653–662, Jun. 2021, doi: 10.1038/s41560-021-00839-0.
- [44] R. Guo and B. M. Gallant, "Li<sub>2</sub>O Solid Electrolyte Interphase: Probing Transport Properties at the Chemical Potential of Lithium," *Chem. Mater.*, vol. 32, no. 13, pp. 5525–5533, Jul. 2020, doi: 10.1021/ACS.CHEMMATER.0C00333/ASSET/IMAGES/LARGE/CM0C00333\_0005.JPEG.
- [45] J. S. Lowe and D. J. Siegel, "Modeling the Interface between Lithium Metal and Its Native Oxide," *ACS Appl. Mater. Interfaces*, vol. 12, no. 41, pp. 46015–46026, Oct. 2020, doi: 10.1021/ACSAMI.0C12468/ASSET/IMAGES/LARGE/AM0C12468\_0009.JPEG.
- [46] H. Zheng, Y. Liu, S. X. Mao, J. Wang, and J. Y. Huang, "Beam-assisted large elongation of in situ formed Li<sub>2</sub>O nanowires," *Sci. Rep.*, vol. 2, no. 1, pp. 1–4, Jul. 2012, doi: 10.1038/srep00542.

- [47] T. S. Attaa, A. N. Abd, and M. J. Zoory, "Fabrication of Al/Li<sub>2</sub>O/PSi/ Si/Al heterojunction for photodetector and solar cell applications," *Mater. Today Proc.*, vol. 49, pp. 3607–3614, Jan. 2022, doi: 10.1016/J.MATPR.2021.08.152.
- [48] L. Vijayalakshmi, K. Naveen Kumar, G. Bhaskar Kumar, and P. Hwang, "Structural, dielectric and photoluminescence properties of Nd<sup>3+</sup> + doped Li<sub>2</sub>O–LiF–B<sub>2</sub>O<sub>3</sub>–ZnO multifunctional optical glasses for solid state laser applications," *J. Non. Cryst. Solids*, vol. 475, pp. 28–37, Nov. 2017, doi: 10.1016/J.JNONCRY SOL.2017.08.024.
- [49] B. Gelloz *et al.*, "Improve the Performance of Porous Silicon for solar application by the embedding of Lithium Oxide nanoparticle," *IOP Conf. Ser. Mater. Sci. Eng.*, vol. 928, no. 7, p. 072142, Nov. 2020, doi: 10.1088/1757-899X/928/7/072142.
- [50] W. Yang *et al.*, "Oxygen-Rich Lithium Oxide Phases Formed at High Pressure for Potential Lithium–Air Battery Electrode," *Adv. Sci.*, vol. 4, no. 9, p. 1600453, Sep. 2017, doi: 10.1002/ADVS.201600453.
- [51] M. R. Al-Ubaidi and J. N. Anno, "The Production of Lithium Oxide Microspheres from the Disintegration of a Liquid Jet," <http://dx.doi.org/10.13182/FST89-A29108>, vol. 16, no. 4, pp. 464–468, 2017, doi: 10.13182/FST89-A29108.
- [52] H. A. Abo-Mosallam, S. Ibrahim, and E. A. Mahdy, "New high nickel-containing glass-ceramics based on Li<sub>2</sub>O–CaO–SiO<sub>2</sub> eutectic (954 °C) system for magnetic applications," *J. Non. Cryst. Solids*, vol. 580, p. 121385, Mar. 2022, doi: 10.1016/J.JNONCRY SOL.2021.121385.
- [53] S. M. Jamil, M. H. D. Othman, M. A. Rahman, J. Jaafar, A. F. Ismail, and M. A. Mohamed, "Role of lithium oxide as a sintering aid for a CGO electrolyte fabricated via a phase inversion technique," *RSC Adv.*, vol. 5, no. 72, pp. 58154–58162, Jul. 2015, doi: 10.1039/C5RA09268J.
- [54] K. Edström, M. Herstedt, and D. P. Abraham, "A new look at the solid electrolyte interphase on graphite anodes in Li-ion batteries," *J. Power Sources*, vol. 153, no. 2, pp. 380–384, Feb. 2006, doi: 10.1016/J.JPOWSOUR.2005.05.062.
- [55] D. Aurbach and M. Dekker, *Nonaqueous Electrochemistry*. 1999.
- [56] E. Peled and S. Menkin, "Review—SEI: Past, Present and Future," *J. Electrochem. Soc.*, vol. 164, no. 7, pp. A1703–A1719, Jun. 2017, doi: 10.1149/2.1441707JES/XML.
- [57] E. Peled, D. Golodnitsky, and J. Penciner, "The Anode/Electrolyte Interface," *Handb. Batter. Mater.*, pp. 419–456, Dec. 1998, doi: 10.1002/9783527611676.CH18.
- [58] J. B. Goodenough, H. Y. P. Hong, and J. A. Kafalas, "Fast Na<sup>+</sup>-ion transport in skeleton structures," *Mater. Res. Bull.*, vol. 11, no. 2, pp. 203–220, Feb. 1976, doi: 10.1016/0025-5408(76)90077-5.
- [59] S. Roy and P. P. Kumar, "Influence of Cationic ordering on ion transport in NASICONs: Molecular dynamics study," *Solid State Ionics*, vol. 253, pp. 217–222, Dec. 2013, doi: 10.1016/J.SSI.2013.09.030.
- [60] M. Guin and F. Tietz, "Survey of the transport properties of sodium superionic conductor materials for use in sodium batteries," *J. Power Sources*, vol. 273, pp. 1056–1064, Jan. 2015, doi: 10.1016/J.JPOWSOUR.2014.09.137.
- [61] S. Susman, C. J. Delbecq, T. O. Brun, and E. Prince, "Fast ion transport in the NASICON



- analog  $\text{Na}_3\text{Sc}_2(\text{PO}_4)_3$ : Structure and conductivity,” *Solid State Ionics*, vol. 9–10, no. PART 2, pp. 839–844, Dec. 1983, doi: 10.1016/0167-2738(83)90099-1.
- [62] H. Y. P. Hong, “Crystal structures and crystal chemistry in the system  $\text{Na}_{1+x}\text{Zr}_2\text{SixP}_{3-x}\text{O}_{12}$ ,” *Mater. Res. Bull.*, vol. 11, no. 2, pp. 173–182, Feb. 1976, doi: 10.1016/0025-5408(76)90073-8.
- [63] T. Jiang *et al.*, “Preparation and electrochemical studies of  $\text{Li}_3\text{V}_2(\text{PO}_4)_3/\text{Cu}$  composite cathode material for lithium ion batteries,” *J. Alloys Compd.*, vol. 488, no. 1, pp. L26–L29, Nov. 2009, doi: 10.1016/J.JALLCOM.2009.08.134.
- [64] J. K. Feng, L. Lu, and M. O. Lai, “Lithium storage capability of lithium ion conductor  $\text{Li}_{1.5}\text{Al}_{0.5}\text{Ge}_{1.5}(\text{PO}_4)_3$ ,” *J. Alloys Compd.*, vol. 501, no. 2, pp. 255–258, Jul. 2010, doi: 10.1016/J.JALLCOM.2010.04.084.
- [65] K. Y. Yang, J. W. Wang, and K. Z. Fung, “Roles of lithium ions and La/Li-site vacancies in sinterability and total ionic conduction properties of polycrystalline  $\text{Li}_3\text{xLa}_{2/3-x}\text{TiO}_3$  solid electrolytes ( $0.21 \leq 3x \leq 0.50$ ),” *J. Alloys Compd.*, vol. 458, no. 1–2, pp. 415–424, Jun. 2008, doi: 10.1016/J.JALLCOM.2007.03.130.
- [66] J. Feng, H. Xia, M. O. Lai, and L. Lu, “NASICON-structured  $\text{LiGe}_2(\text{PO}_4)_3$  with improved cyclability for high-performance lithium batteries,” *J. Phys. Chem. C*, vol. 113, no. 47, pp. 20514–2052, 2009, doi: 10.1021/JP9085602/ASSET/IMAGES/LARGE/JP-2009-085602\_0009.JPEG.
- [67] G. Govindaraj and C. R. Mariappan, “Synthesis, characterization and ion dynamic studies of NASICON type glasses,” *Solid State Ionics*, vol. 147, no. 1–2, pp. 49–59, Mar. 2002, doi: 10.1016/S0167-2738(02)00005-X.
- [68] Q. Zhang, Z. Wen, Y. Liu, S. Song, and X. Wu, “ $\text{Na}^+$  ion conductors of glass–ceramics in the system  $\text{Na}_{1+x}\text{Al}_x\text{Ge}_{2-x}\text{P}_3\text{O}_{12}$  ( $0.3 \leq x \leq 1.0$ ),” *J. Alloys Compd.*, vol. 479, no. 1–2, pp. 494–499, Jun. 2009, doi: 10.1016/J.JALLCOM.2008.12.106.
- [69] N. Anantharamulu, K. K. Rao, M. Vithal, and G. Prasad, “Preparation, characterization, impedance and thermal expansion studies of  $\text{Mn}_{0.5}\text{MSb}(\text{PO}_4)_3$  ( $\text{M} = \text{Al}, \text{Fe}$  and  $\text{Cr}$ ),” *J. Alloys Compd.*, vol. 479, no. 1–2, pp. 684–691, Jun. 2009, doi: 10.1016/J.JALLCOM.2009.01.038.
- [70] J. Fu, “Superionic conductivity of glass-ceramics in the system  $\text{Li}_2\text{O}-\text{Al}_2\text{O}_3-\text{TiO}_2-\text{P}_2\text{O}_5$ ,” *Solid State Ionics*, vol. 96, no. 3–4, pp. 195–200, Apr. 1997, doi: 10.1016/S0167-2738(97)00018-0.
- [71] X. Li, M. Qu, and Z. Yu, “Structural and electrochemical performances of  $\text{Li}_4\text{Ti}_5-x\text{Zr}_x\text{O}_{12}$  as anode material for lithium-ion batteries,” *J. Alloys Compd.*, vol. 487, no. 1–2, pp. L12–L17, Nov. 2009, doi: 10.1016/J.JALLCOM.2009.07.176.
- [72] S. Q. Liu, S. C. Li, K. L. Huang, B. L. Gong, and G. Zhang, “Kinetic study on  $\text{Li}_{2.8}(\text{V}_{0.9}\text{Ge}_{0.1})_2(\text{PO}_4)_3$  by EIS measurement,” *J. Alloys Compd.*, vol. 450, no. 1–2, pp. 499–504, Feb. 2008, doi: 10.1016/J.JALLCOM.2006.11.131.
- [73] X. L. Yao, S. Xie, H. Q. Nian, and C. H. Chen, “Spinel  $\text{Li}_4\text{Ti}_5\text{O}_{12}$  as a reversible anode material down to 0 V,” *J. Alloys Compd.*, vol. 465, no. 1–2, pp. 375–379, Oct. 2008, doi: 10.1016/J.JALLCOM.2007.10.113.
- [74] C. Q. Zhang, J. P. Tu, X. H. Huang, Y. F. Yuan, S. F. Wang, and F. Mao, “Preparation and electrochemical performances of nanoscale  $\text{FeSn}_2$  as anode material for lithium ion

- batteries," *J. Alloys Compd.*, vol. 457, no. 1–2, pp. 81–85, Jun. 2008, doi: 10.1016/J.JALLCOM.2007.03.039.
- [75] J. S. Thokchom and B. Kumar, "Composite effect in superionically conducting lithium aluminium germanium phosphate based glass-ceramic," *J. Power Sources*, vol. 185, no. 1, pp. 480–485, Oct. 2008, doi: 10.1016/J.JPOWSOUR.2008.07.009.
- [76] K. Arbi, J. M. Rojo, and J. Sanz, "Lithium mobility in titanium based Nasicon  $\text{Li}_{1+x}\text{Ti}_{2-x}\text{Al}_x(\text{PO}_4)_3$  and  $\text{LiTi}_{2-x}\text{Zr}_x(\text{PO}_4)_3$  materials followed by NMR and impedance spectroscopy," *J. Eur. Ceram. Soc.*, vol. 27, no. 13–15, pp. 4215–4218, Jan. 2007, doi: 10.1016/J.JEURCERAMSOC.2007.02.118.
- [77] J. S. Peña, I. Sandu, O. Joubert, F. S. Pascual, C. O. Areán, and T. Brousse, "Electrochemical reaction between lithium and  $\beta$ -quartz  $\text{GeO}_2$ ," *Electrochem. Solid-State Lett.*, vol. 7, no. 9, p. A278, Aug. 2004, doi: 10.1149/1.1778931/XML.
- [78] H. Lee, M. G. Kim, C. H. Choi, Y. K. Sun, C. S. Yoon, and J. Cho, "Surface-stabilized amorphous germanium nanoparticles for lithium-storage material," *J. Phys. Chem. B*, vol. 109, no. 44, pp. 20719–20723, Nov. 2005, doi: 10.1021/JP052620Y/ASSET/IMAGES/LARGE/JP052620YF00008.JPEG.
- [79] R. DeWees and H. Wang, "Synthesis and Properties of NaSICON-type LATP and LAGP Solid Electrolytes," *ChemSusChem*, vol. 12, no. 16, pp. 3713–3725, Aug. 2019, doi: 10.1002/CSSC.201900725.
- [80] E. Kazakevičius *et al.*, "La-doped  $\text{LiTi}_2(\text{PO}_4)_3$  ceramics," *Solid State Ionics*, vol. 179, no. 1–6, pp. 51–56, Mar. 2008, doi: 10.1016/J.SSI.2007.12.025.
- [81] M. Rohde, Y. Cui, C. Ziebert, and H. J. Seifert, "Thermophysical Properties of Lithium Aluminum Germanium Phosphate with Different Compositions," *Int. J. Thermophys.*, vol. 41, no. 3, Mar. 2020, doi: 10.1007/S10765-020-2607-0.
- [82] D. Campanella, D. Belanger, and A. Paoletta, "Beyond garnets, phosphates and phosphosulfides solid electrolytes: New ceramic perspectives for all solid lithium metal batteries," *J. Power Sources*, vol. 482, p. 228949, Jan. 2021, doi: 10.1016/J.JPOWSOUR.2020.228949.
- [83] M. Schroeder, S. Glatthaar, and J. R. Binder, "Influence of spray granulation on the properties of wet chemically synthesized  $\text{Li}_{1.3}\text{Ti}_{1.7}\text{Al}_{0.3}(\text{PO}_4)_3$  (LATP) powders," *Solid State Ionics*, vol. 201, no. 1, pp. 49–53, Oct. 2011, doi: 10.1016/J.SSI.2011.08.014.
- [84] J. S. Thokchom, N. Gupta, and B. Kumar, "Superionic Conductivity in a Lithium Aluminum Germanium Phosphate Glass–Ceramic," *J. Electrochem. Soc.*, vol. 155, no. 12, p. A915, Oct. 2008, doi: 10.1149/1.2988731/XML.
- [85] J. W. Fergus, "Ceramic and polymeric solid electrolytes for lithium-ion batteries," *J. Power Sources*, vol. 195, no. 15, pp. 4554–4569, Aug. 2010, doi: 10.1016/J.JPOWSOUR.2010.01.076.
- [86] B. Francisco, C. Stoldt, J. M.-C. of Materials, and undefined 2014, "Lithium-ion trapping from local structural distortions in sodium super ionic conductor (NASICON) electrolytes," *ACS Publ.*, vol. 26, no. 16, pp. 4741–4749, Aug. 2014, doi: 10.1021/cm5013872.
- [87] M. Cretin and P. Fabry, "Comparative study of lithium ion conductors in the system  $\text{Li}_{1+x}\text{Al}_x\text{A}_{2-x}\text{IV}(\text{PO}_4)_3$  with  $\text{AIV}=\text{Ti}$  or  $\text{Ge}$  and  $0 \leq x \leq 0.7$  for use as  $\text{Li}^+$  sensitive

- membranes,” *J. Eur. Ceram. Soc.*, vol. 19, no. 16, pp. 2931–2940, Dec. 1999, doi: 10.1016/S0955-2219(99)00055-2.
- [88] X. Xu, Z. Wen, X. Wu, X. Yang, and Z. Gu, “Lithium Ion-Conducting Glass–Ceramics of  $\text{Li}_{1.5}\text{Al}_{0.5}\text{Ge}_{1.5}(\text{PO}_4)_3\text{--}x\text{Li}_2\text{O}$  ( $x=0.0\text{--}0.20$ ) with Good Electrical and Electrochemical Properties,” *J. Am. Ceram. Soc.*, vol. 90, no. 9, pp. 2802–2806, Sep. 2007, doi: 10.1111/J.1551-2916.2007.01827.X.
- [89] A. Dumon, M. Huang, Y. Shen, and C. W. Nan, “High Li ion conductivity in strontium doped  $\text{Li}_7\text{La}_3\text{Zr}_2\text{O}_{12}$  garnet,” *Solid State Ionics*, vol. 243, pp. 36–41, Jul. 2013, doi: 10.1016/J.SSI.2013.04.016.
- [90] K. He *et al.*, “Stability of lithium ion conductor NASICON structure glass ceramic in acid and alkaline aqueous solution,” *Solid State Ionics*, vol. 254, pp. 78–81, Jan. 2014, doi: 10.1016/J.SSI.2013.11.011.
- [91] B. V. R. Chowdari, G. V. Subba Rao, and G. Y. H. Lee, “XPS and ionic conductivity studies on  $\text{Li}_2\text{O--Al}_2\text{O}_3\text{--}(\text{TiO}_2 \text{ or } \text{GeO}_2)\text{--P}_2\text{O}_5$  glass–ceramics,” *Solid State Ionics*, vol. 136–137, pp. 1067–1075, Nov. 2000, doi: 10.1016/S0167-2738(00)00500-2.
- [92] G. Delaizir *et al.*, “A New Approach to Develop Safe All-Inorganic Monolithic Li-Ion Batteries,” *Adv. Energy Mater.*, vol. 1, no. 2, pp. 179–183, Mar. 2011, doi: 10.1002/AENM.201000050.
- [93] K. Arbi, W. Bucheli, R. Jiménez, and J. Sanz, “High lithium ion conducting solid electrolytes based on NASICON  $\text{Li}_{1+x}\text{Al}_x\text{M}_{2-x}(\text{PO}_4)_3$  materials ( $\text{M} = \text{Ti, Ge}$  and  $0 \leq x \leq 0.5$ ),” *J. Eur. Ceram. Soc.*, vol. 35, no. 5, pp. 1477–1484, May 2015, doi: 10.1016/J.JEURCERAMSOC.2014.11.023.
- [94] J. Shi *et al.*, “Lithium ion conductive  $\text{Li}_{1.5}\text{Al}_{0.5}\text{Ge}_{1.5}(\text{PO}_4)_3$  based inorganic–organic composite separator with enhanced thermal stability and excellent electrochemical performances in 5 V lithium ion batteries,” *J. Power Sources*, vol. 273, pp. 389–395, Jan. 2015, doi: 10.1016/J.JPOWSOUR.2014.09.105.
- [95] Y. Liu *et al.*, “Germanium Thin Film Protected Lithium Aluminum Germanium Phosphate for Solid-State Li Batteries,” *Adv. Energy Mater.*, vol. 8, no. 16, p. 1702374, Jun. 2018, doi: 10.1002/AENM.201702374.
- [96] P. Vernoux, F. Gaillard, C. Lopez, and E. Siebert, “Coupling catalysis to electrochemistry: a solution to selective reduction of nitrogen oxides in lean-burn engine exhausts?,” *J. Catal.*, vol. 217, no. 1, pp. 203–208, Jul. 2003, doi: 10.1016/S0021-9517(03)00052-6.
- [97] R. Roy, E. R. Vance, and J. Alamo, “[NZIP], a new radiophase for ceramic nuclear waste forms,” *Mater. Res. Bull.*, vol. 17, no. 5, pp. 585–589, May 1982, doi: 10.1016/0025-5408(82)90040-X.
- [98] S. NAKAYAMA and K. ITOH, “Immobilization Technique of Cesium to  $\text{HZr}_2(\text{PO}_4)_3$  Using an Autoclave,” *J. Nucl. Sci. Technol.*, 2012, doi: 10.1080/18811248.2003.9715400.
- [99] B. E. Scheetz, D. K. Agrawal, E. Breval, and R. Roy, “Sodium zirconium phosphate (NZP) as a host structure for nuclear waste immobilization: A review,” *Waste Manag.*, vol. 14, no. 6, pp. 489–505, Jan. 1994, doi: 10.1016/0956-053X(94)90133-3.
- [100] B. Li, Z. Qing, Y. Li, H. Li, and S. Zhang, “Effect of  $\text{CaO}$  content on structure and properties of low temperature co-fired glass–ceramic in the  $\text{Li}_2\text{O--Al}_2\text{O}_3\text{--SiO}_2$  system,” *J. Mater. Sci. Mater. Electron.*, vol. 27, no. 3, pp. 2455–2459, Mar. 2016, doi:

10.1007/S10854-015-4045-5/FIGURES/7.

- [101] B. Li, D. Duan, and Q. Long, "Effects of TiO<sub>2</sub> on microstructures and properties of Li<sub>2</sub>O–Al<sub>2</sub>O<sub>3</sub>–SiO<sub>2</sub> glass–ceramics for LTCC substrates," *J. Mater. Sci. Mater. Electron.*, vol. 27, no. 7, pp. 7240–7245, Jul. 2016, doi: 10.1007/S10854-016-4690-3/TABLES/3.
- [102] V. O. Soares, O. Peitl, and E. D. Zanotto, "New Sintered Li<sub>2</sub>O–Al<sub>2</sub>O<sub>3</sub>–SiO<sub>2</sub> Ultra-Low Expansion Glass-Ceramic," *J. Am. Ceram. Soc.*, vol. 96, no. 4, pp. 1143–1149, Apr. 2013, doi: 10.1111/JACE.12266.
- [103] M. Chen, F. He, J. Shi, J. Xie, H. Yang, and P. Wan, "Low Li<sub>2</sub>O content study in Li<sub>2</sub>O–Al<sub>2</sub>O<sub>3</sub>–SiO<sub>2</sub> glass-ceramics," *J. Eur. Ceram. Soc.*, vol. 39, no. 15, pp. 4988–4995, Dec. 2019, doi: 10.1016/J.JEURCERAMSOC.2019.07.032.
- [104] M. H. Braga, J. E. Oliveira, A. J. Murchison, and J. B. Goodenough, "Performance of a ferroelectric glass electrolyte in a self-charging electrochemical cell with negative capacitance and resistance," *Appl. Phys. Rev.*, vol. 7, no. 1, p. 011406, Feb. 2020, doi: 10.1063/1.5132841.
- [105] M. H. Braga, J. A. Ferreira, A. J. Murchison, and J. B. Goodenough, "Electric Dipoles and Ionic Conductivity in a Na + Glass Electrolyte," *J. Electrochem. Soc.*, vol. 164, no. 2, pp. A207–A213, Dec. 2017, doi: 10.1149/2.0691702JES/XML.
- [106] M. H. Braga, N. S. Grundish, A. J. Murchison, and J. B. Goodenough, "Alternative strategy for a safe rechargeable battery," *Energy Environ. Sci.*, vol. 10, no. 1, 2017, doi: 10.1039/c6ee02888h.
- [107] F. Danzi, R. M. Salgado, J. E. Oliveira, A. Arteiro, P. P. Camanho, and M. H. Braga, "Structural Batteries: A Review," *Molecules*, vol. 26, no. 8, Apr. 2021, doi: 10.3390/MOLECULES26082203.
- [108] W. Xia *et al.*, "Antiperovskite Electrolytes for Solid-State Batteries," *Chem. Rev.*, vol. 122, no. 3, pp. 3763–3819, Feb. 2022, doi: 10.1021/ACS.CHEMREV.1C00594/SUPPL\_FILE/CR1C00594\_SI\_001.PDF.
- [109] M. H. Braga, J. E. Oliveira, T. Kai, A. J. Murchison, A. J. Bard, and J. B. Goodenough, "Extraordinary Dielectric Properties at Heterojunctions of Amorphous Ferroelectrics," *J. Am. Chem. Soc.*, vol. 140, no. 51, pp. 17968–17976, Dec. 2018, doi: 10.1021/jacs.8b09603.
